# Supplementary material
Source: PubMed Central journal article supplement (PMC5286947)
Supplement: 2016.144139.McCURDY_SUPPL.pdf [file 2016.144139.McCURDY_SUPPL.pdf]

## Comparable composite endpoints after HLA-matched and HLA-haploidentical transplantation with post-transplantation cyclophosphamide

Shannon R. McCurdy,<sup>1</sup> Yvette L. Kasamon,<sup>1</sup> Christopher G. Kanakry,<sup>1</sup> Javier Bolaños-Meade,<sup>1</sup> Hua-Ling Tsai,<sup>2</sup> Margaret M. Showel,<sup>1</sup> Jennifer A. Kanakry,<sup>1</sup> Heather J. Symons,<sup>1</sup> Ivana Gojo,<sup>1</sup> B. Douglas Smith,<sup>1</sup> Maria P. Bettinotti,<sup>3</sup> William H. Matsui,<sup>1</sup> Amy E. Dezern,<sup>1</sup> Carol Ann Huff,<sup>1</sup> Ivan Borrello,<sup>1</sup> Keith W. Pratz,<sup>1</sup> Douglas E. Gladstone,<sup>1</sup> Lode J. Swinnen,<sup>1</sup> Robert A. Brodsky,<sup>1</sup> Mark J. Levis,<sup>1</sup> Richard F. Ambinder,<sup>1</sup> Ephraim J. Fuchs,<sup>1</sup> Gary L. Rosner,<sup>3</sup> Richard J. Jones<sup>1</sup> and Leo Luznik<sup>1</sup>

<sup>1</sup>Sidney Kimmel Comprehensive Cancer Center, Johns Hopkins University School of Medicine; <sup>2</sup>Biostatistics & Bioinformatics, Sidney Kimmel Comprehensive Cancer Center, Johns Hopkins University and <sup>3</sup>Immunogenetics Laboratory, Johns Hopkins University School of Medicine, Baltimore, MD, USA

©2017 Ferrata Storti Foundation. This is an open-access paper. doi:10.3324/haematol.2016.144139

Received: February 8, 2016.

Accepted: October 17, 2016.

Pre-published: October 20, 2016.

Correspondence: luznik@jhmi.edu

---

## **Supplementary Materials**

### **Multivariable Analyses and Post-Relapse Survival**

Multivariable analyses were conducted separately by GRFS and CRFS outcomes via Cox proportional hazard models stratified by BMT year in order to examine the association of transplant platforms with outcomes after adjusting for potential confounders. Not only was there a higher proportion of patients undergoing haplo BMT than MA HLA-matched BMT from 2009-2012, but the hazards for GRFS and CRFS were significantly different between these year categories. Thus we stratified by BMT year to account for the impact of experience with PTCy-based transplantation platforms. Further, we considered all characteristics shown in Table 1 as candidate risk factors except patient gender and disease diagnosis. These were excluded because female into male allografting, which has been shown to be prognostic of GVHD and is determined by patient gender, and the disease risk index (DRI), which includes disease diagnosis and is associated with relapse and survival after BMT,<sup>1</sup> were both included. Final multivariable models were selected via backward procedures with p-values <0.05 as inclusion criteria with patient age and transplant platforms always included in the model.

Due to the high correlation between the time from BMT to relapse and relapse to death a cut point to categorize the groups was set at 6 months, based on numbers of patients at risk and events in our data. Kaplan-Meier curves for post-relapse survival were presented and stratified by time to relapse at 6 months. Similar to prior publications of post-relapse survival, time zero for post-relapse survival was relapse date and relapse time was not time-dependent after observing the relapse event.<sup>2-5</sup> Furthermore, a multivariable analysis for post-relapse survival to evaluate the difference among transplant platforms was conducted via the same model selection procedures as used for GRFS and CRFS, but with the additional inclusion of time of relapse as a candidate risk factor.

All analyses were carried out using the statistical software R version 3.2.0 (R Foundation for Statistical Computing, Vienna, Austria). All reported p-values were two sided. In order to adjust for multiple testing, p-values less than .01 were interpreted as statistically significant.

### **Donor Selection and Treatment Plan**

Donors were molecularly typed at HLA-A, -B, -Cw, -DRB1, and -DQB1 and were either 10/10 MRD or MUD, or, if haploidentical were 1<sup>st</sup> degree or half sibling related donors who had one to five mismatches at the antigen or allele level in either the GVH or host-versus-graft direction. All patients undergoing MRD or MUD BMT received MA conditioning. MA conditioned patients received either busulfan 1mg/kg PO or 0.8mg/kg IV (days -6 to -3) every six hours with adjustments based on pharmacokinetic measurements to achieve an area under the concentration curve of 800 to 1400 micromol\*min/L and Cy 50mg/kg IV (days -2 and -1) (n=270)<sup>6</sup> or busulfan IV daily based on a test dose to achieve a targeted daily systemic exposure of 4600 µMol-min (acceptable range 3600-5600 µMol-min) and fludarabine 40mg/m<sup>2</sup>

IV (both days -5 to -2) (n=42) as previously published.<sup>7,8</sup> Patients receiving haplo grafts received NMA conditioning, which consisted of fludarabine (30 mg/m<sup>2</sup> IV days -6 to -2), Cy (14.5 mg/kg IV days -6 and -5), and total body irradiation (TBI, 200 cGy day -1).<sup>9</sup> All patients received a T-cell-replete bone marrow graft (day 0) collected with a targeted total nucleated cell (TNC) count of  $4.0 \times 10^8$  TNC/kg of recipient ideal body weight followed by PTCy (50 mg/kg IV on days +3 and +4) with mesna. Haplo transplant recipients received MMF and tacrolimus starting on day +5 and standardly stopped without taper in the absence of GVHD at day +35 (MMF) and either day +90 (n=45) or +180 (n=327) (tacrolimus). NMA haplo patients received filgrastim from day +5 until neutrophil recovery, while MA MRD or MUD patients did not receive growth factor support. Patients receiving second or subsequent allogeneic transplants or regimens other than the three defined above were excluded from the study. Patients receiving posttransplant maintenance therapy with hypomethylating agents, tyrosine kinase inhibitors, or rituximab were included in this analysis.

### Supplementary References

1. Armand P, Gibson CJ, Cutler C, et al. A disease risk index for patients undergoing allogeneic stem cell transplantation. *Blood*. 2012;120(4):905-913.
2. Solh M, Zhang X, Connor K, et al. Post-relapse survival after haploidentical transplantation vs matched-related or matched-unrelated hematopoietic cell transplantation. *Bone marrow transplantation*. 2016;51(7):949-954.
3. Bejanyan N, Oran B, Shanley R, et al. Clinical outcomes of AML patients relapsing after matched-related donor and umbilical cord blood transplantation. *Bone marrow transplantation*. 2014;49(8):1029-1035.
4. Gokbuget N, Stanze D, Beck J, et al. Outcome of relapsed adult lymphoblastic leukemia depends on response to salvage chemotherapy, prognostic factors, and performance of stem cell transplantation. *Blood*. 2012;120(10):2032-2041.
5. Fielding AK, Richards SM, Chopra R, et al. Outcome of 609 adults after relapse of acute lymphoblastic leukemia (ALL); an MRC UKALL12/ECOG 2993 study. *Blood*. 2007;109(3):944-950.
6. Luznik L, Bolanos-Meade J, Zahurak M, et al. High-dose cyclophosphamide as single-agent, short-course prophylaxis of graft-versus-host disease. *Blood*. 2010;115(16):3224-3230.
7. Kanakry CG, O'Donnell PV, Furlong T, et al. Multi-institutional study of post-transplantation cyclophosphamide as single-agent graft-versus-host disease prophylaxis after allogeneic bone marrow transplantation using myeloablative busulfan and fludarabine conditioning. *Journal of clinical oncology : official journal of the American Society of Clinical Oncology*. 2014;32(31):3497-3505.
8. Lombardi LR, Kanakry CG, Zahurak M, et al. Therapeutic drug monitoring for either oral or intravenous busulfan when combined with pre- and post-transplantation cyclophosphamide. *Leukemia & lymphoma*. 2015;1-10.
9. Luznik L, O'Donnell PV, Symons HJ, et al. HLA-haploidentical bone marrow transplantation for hematologic malignancies using nonmyeloablative conditioning and high-dose, posttransplantation cyclophosphamide. *Biology of blood and marrow transplantation : journal of the American Society for Blood and Marrow Transplantation*. 2008;14(6):641-650.
