# Supplementary material
Source: PubMed Central journal article supplement (PMC5286947)
Supplement: 2016_144139-Disclosures_and_Contributions.pdf [file 2016_144139-Disclosures_and_Contributions.pdf]

Haematologica  
HAEMATOL/2016/144139  
Version 4

Comparable composite endpoints after HLA-matched and  
HLA-haploidentical transplantation with posttransplantation  
cyclophosphamide

Shannon R. McCurdy, Yvette L. Kasamon, Christopher G. Kanakry, Javier Bolaños-Meade, Hua-Ling Tsai, Margaret M. Showel, Jennifer A. Kanakry, Heather J. Symons, Ivana Gojo, B. Douglas Smith, Maria P. Bettinotti, William H. Matsui, Amy E. Dezern, Carol Ann Huff, Ivan Borrello, Keith W. Pratz, Douglas E. Gladstone, Lode J. Swinnen, Robert A. Brodsky, Mark J. Levis, Richard F. Ambinder, Ephraim J. Fuchs, Gary L. Rosner, Richard J. Jones, and Leo Luznik

Disclosures: none

Contributions: Contribution: S.R.M. and L.L. were involved in the study's conception and design, data collection, analysis, and interpretation, primary writing of the manuscript, and manuscript revisions; Y.L.K, C.G.K, R.J.J., and E.J.F. were also involved in conception and design, data collection, data analysis and interpretation, and manuscript revisions; H.-L.T. and G.L.R. statistically analyzed and interpreted the data and helped revise the manuscript; J.A.K., M.M.S., J.B.-M., H.J.S., R.A.B., D.E.G., C.A.H., K.W.P., A.E.D., I.G., W.H.M., I.B., M.A.M., L.J.S., B.D.S., M.J.L., M.P.B, and R.F.A. were involved in data collection; K.W.P., R.A.B., and H.J.S. also helped revise the manuscript; and all authors approved the manuscript.
